# Supplementary material
Source: PubMed Central journal article supplement (PMC3422485)
Supplement: npp201269x1.pdf [file npp201269x1.pdf]

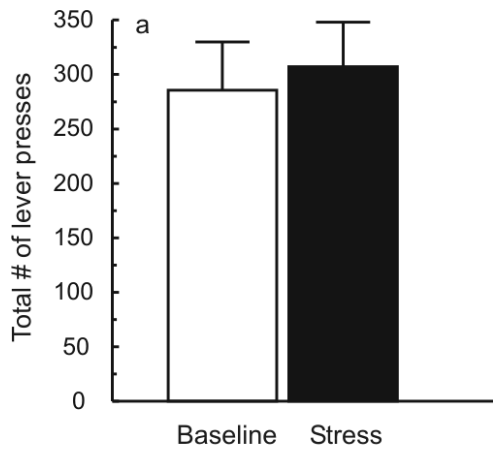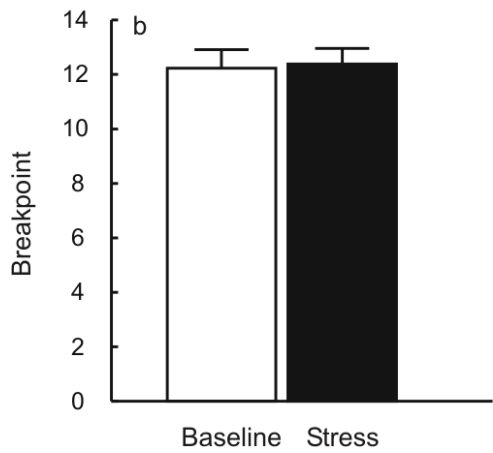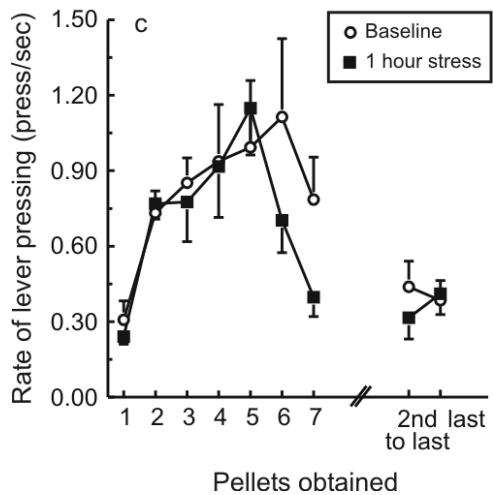

**Supplementary Figure 1.** Responding on a progressive ratio schedule of reinforcement following acute restraint stress. Stress did not alter the total number of lever presses (a) or the breakpoint (b) relative to baseline. Acute restraint stress did not alter rates of lever pressing (c). Graph depicts rates of lever pressing to obtain the first 7 and last 2 pellets.
